# Supplementary material for: Isolation and characterization of new lignin streams derived from extractive-ammonia (EA) pretreatment
Source: Royal Society of Chemistry journal article supplement (doi:10.1039/c6gc00298f), 2016-01-01
Supplement: c6gc00298f1.pdf [file c6gc00298f1.pdf]

Electronic Supplementary Information

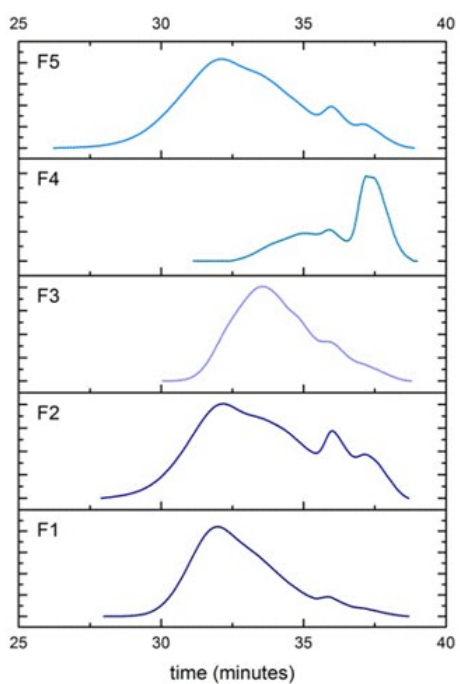

Fig. S1 – Gel permeation chromatograms of acetylated solid residues isolated from F1-F5.
